# Supplementary material for: Preparation, crystal structure and luminescence properties of a novel single-phase red emitting phosphor CaSr2(PO4)2:Sm3+,Li+
Source: Royal Society of Chemistry journal article supplement (doi:10.1039/c9ra00264b), 2019-01-01
Supplement: c9ra00264b1.pdf [file c9ra00264b1.pdf]

**Supporting Information for:**

**Preparation, crystal structure and luminescence properties of a novel  
single-phase red emitting phosphor  $\text{CaSr}_2(\text{PO}_4)_2: \text{Sm}^{3+}, \text{Li}^+$**

Yuying Chen,<sup>a,b</sup> Qingfeng Guo,<sup>\* a,b</sup> Libing Liao,<sup>\*c</sup> Mingyue He,<sup>a,b</sup> Tianshuai Zhou,<sup>c</sup> Lefu Mei,<sup>\*c</sup> Marcin Runowski,<sup>d</sup> Bin Ma<sup>e</sup>

*<sup>a</sup> School of Gemology, China University of Geosciences, Beijing 100083, China.*

*<sup>b</sup> Jewelry and mineral materials Laboratory of experimental teaching demonstration center, Beijing.*

*<sup>c</sup> Beijing Key Laboratory of Materials Utilization of Nonmetallic Minerals and Solid Wastes, National Laboratory of Mineral Materials. School of Materials Sciences and Technology, China University of Geosciences, Beijing 100083, China*

*<sup>d</sup> Adam Mickiewicz University, Faculty of Chemistry, Department of Rare Earths, Umultowska 89b, 61-614 Poznań, Poland*

*<sup>e</sup> Qinghai Provincial Key Laboratory of New Light Alloys, Qinghai Provincial Engineering Research Center of High Performance Light Metal Alloys and Forming, Qinghai University, Xining 810016, PR China.*

---

**\* \* Corresponding Authors**

**Qingfeng Guo**, E-mail: [qfguo@cugb.edu.cn](mailto:qfguo@cugb.edu.cn);

**Libing Liao**, E-mail: [clayl@cugb.edu.cn](mailto:clayl@cugb.edu.cn);

**Lefu Mei**, E-mail: [mlf@cugb.edu.cn](mailto:mlf@cugb.edu.cn);

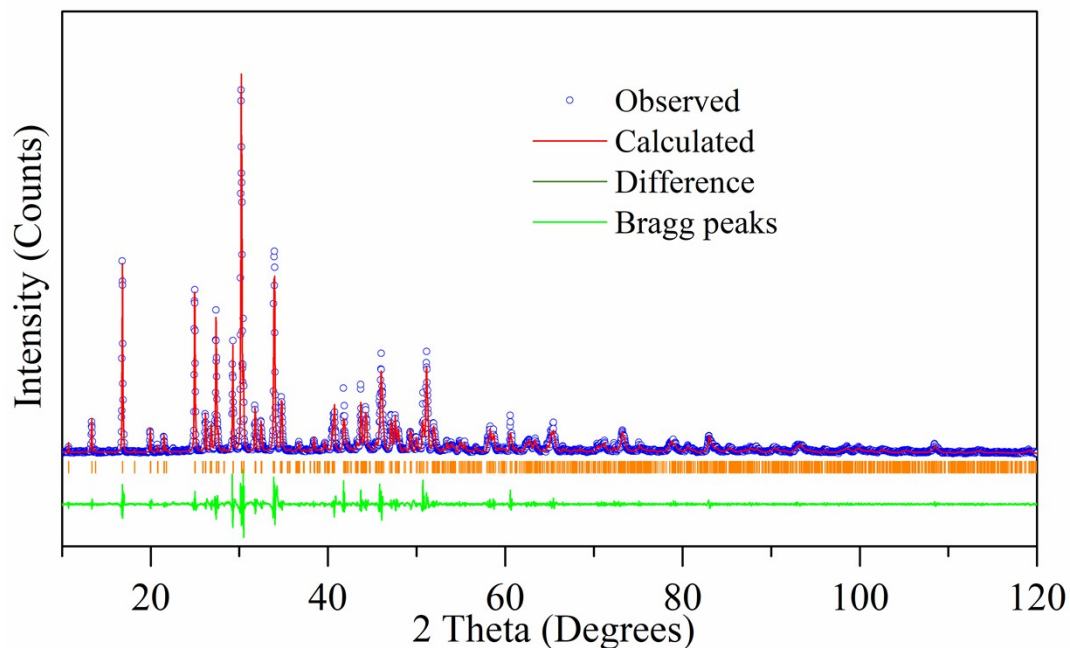

Fig. S1 The Rietveld refinement of  $\text{CaSr}_{1.82}\text{Sm}_{0.09}\text{Li}_{0.09}(\text{PO}_4)_2$  by TOPAS program. Solid red lines are calculated intensities, and blue circles are the observed intensities. Short orange vertical lines show the position of Bragg reflections of the calculated pattern. Green solid lines below the profiles stand for the difference between the observed and the calculated intensities.

Table S1. Crystallographic data for  $\text{CaSr}_{1.82}\text{Sm}_{0.09}\text{Li}_{0.09}(\text{PO}_4)_2$  based on Rietveld refinement.

| Formula         | $\text{CaSr}_{1.82}\text{Sm}_{0.09}\text{Li}_{0.09}(\text{PO}_4)_2$ |
|-----------------|---------------------------------------------------------------------|
| Space group     | <i>R3c</i> (161)                                                    |
| Symmetry        | <i>Trigonal</i>                                                     |
| a/b(Å)          | 10.5918(11)                                                         |
| c(Å)            | 38.835(4)                                                           |
| $\alpha/\beta$  | 90°                                                                 |
| $\gamma$        | 120°                                                                |
| $V(\text{Å}^3)$ | 3773.06(55)                                                         |
| $R_{wp}(\%)$    | 15.47                                                               |
| $R_p(\%)$       | 10.64                                                               |
| $\chi^2$        | 7.757                                                               |

Table S2. The refined atomic positions and isotropic temperature factors for all atoms.

| Atom | Wyckoff<br>position | <i>x</i>   | <i>y</i>   | <i>z</i>   | $U_{\text{iso}}$ |
|------|---------------------|------------|------------|------------|------------------|
| Ca1  | 18 <i>b</i>         | 0.7254(24) | 0.8510(31) | 0.1923(8)  | 0.040(9)         |
| Sr1  | 18 <i>b</i>         | 0.7254(24) | 0.8510(31) | 0.1923(8)  | 0.040(9)         |
| Sm1  | 18 <i>b</i>         | 0.7254(24) | 0.8510(31) | 0.1923(8)  | 0.040(9)         |
| Li1  | 18 <i>b</i>         | 0.7254(24) | 0.8510(31) | 0.1923(8)  | 0.040(9)         |
| Ca2  | 18 <i>b</i>         | 0.6320(25) | 0.8104(31) | -0.0111(7) | 0.015(7)         |
| Sr2  | 18 <i>b</i>         | 0.6320(25) | 0.8104(31) | -0.0111(7) | 0.015(7)         |
| Sm2  | 18 <i>b</i>         | 0.6320(25) | 0.8104(31) | -0.0111(7) | 0.015(7)         |
| Li2  | 18 <i>b</i>         | 0.6320(25) | 0.8104(31) | -0.0111(7) | 0.015(7)         |
| Ca3  | 18 <i>b</i>         | 0.7075(24) | 0.8628(25) | 0.0879(8)  | 0.016(5)         |
| Sr3  | 18 <i>b</i>         | 0.7075(24) | 0.8628(25) | 0.0879(8)  | 0.016(5)         |
| Sm3  | 18 <i>b</i>         | 0.7075(24) | 0.8628(25) | 0.0879(8)  | 0.016(5)         |
| Li3  | 18 <i>b</i>         | 0.7075(24) | 0.8628(25) | 0.0879(8)  | 0.016(5)         |
| Ca4  | 6 <i>a</i>          | 0          | 0          | -0.07723   | 0.0126           |
| Sr4  | 6 <i>a</i>          | 0          | 0          | -0.07723   | 0.0126           |
| Sm4  | 6 <i>a</i>          | 0          | 0          | -0.07723   | 0.0126           |
| Li4  | 6 <i>a</i>          | 0          | 0          | -0.07723   | 0.0126           |
| Ca5  | 6 <i>a</i>          | 0          | 0          | 0.75595    | 0.0504           |
| P1   | 6 <i>a</i>          | 0          | 0          | 0          | 0.0589           |
| P2   | 18 <i>b</i>         | 0.72429    | 0.84177    | 0.88810    | 0.0269           |
| P3   | 18 <i>b</i>         | 0.65703    | 0.83698    | 0.79027    | 0.0474           |
| O1   | 18 <i>b</i>         | 0.74948    | -0.14214   | -0.06854   | -0.0301          |
| O2   | 18 <i>b</i>         | 0.77933    | 0.75582    | 0.88544    | 0.0428           |
| O3   | 18 <i>b</i>         | 0.65657    | 0.04995    | 0.87126    | 0.1265           |
| O4   | 18 <i>b</i>         | 0.59511    | 0.87538    | 0.89581    | 0.0702           |
| O5   | 18 <i>b</i>         | 0.61718    | -0.11692   | 0.79938    | 0.1148           |
| O6   | 18 <i>b</i>         | 0.60509    | 0.63715    | 0.81502    | 0.0256           |
| O7   | 18 <i>b</i>         | 0.09528    | 0.91418    | 0.79922    | -0.0512          |
| O8   | 18 <i>b</i>         | 0.62949    | 0.81201    | 0.74855    | 0.0803           |
| O9   | 18 <i>b</i>         | -0.03498   | 0.85258    | -0.01338   | 0.0158           |
| O10  | 6 <i>a</i>          | 0          | 0          | 0.04823    | 0.0197           |
